# Supplementary material for: Observation of acoustic Dirac-like cone and double zero refractive index
Source: PubMed Central journal article supplement (PMC5364384; doi:10.1038/ncomms14871), 2017-03-20
Supplement: ncomms14871-s5.pdf [file ncomms14871-s5.pdf]

**Editorial Note:** this manuscript has been previously reviewed at another journal that is not operating a transparent peer review scheme. This document only contains reviewer comments and rebuttal letters for versions considered at Nature Communications.
